# Supplementary material
Source: publisher figshare collection journal article supplement (https://acs.figshare.com/ndownloader/files/5089408)
Supplement: Supplementary file 1 [file 5089408]

 
data_rde108 
 
_audit_creation_method            SHELXL-97 
_chemical_name_systematic 
; 
 ? 
; 
_chemical_name_common             ? 
_chemical_melting_point           ? 
_chemical_formula_moiety          'C16 H20 W' 
_chemical_formula_sum 
 'C16 H20 W' 
_chemical_formula_weight          396.17 
 
loop_ 
 _atom_type_symbol 
 _atom_type_description 
 _atom_type_scat_dispersion_real 
 _atom_type_scat_dispersion_imag 
 _atom_type_scat_source 
 'C'  'C'   0.0033   0.0016 
 'International Tables Vol C Tables 4.2.6.8 and 6.1.1.4' 
 'H'  'H'   0.0000   0.0000 
 'International Tables Vol C Tables 4.2.6.8 and 6.1.1.4' 
 'W'  'W'  -0.8490   6.8722 
 'International Tables Vol C Tables 4.2.6.8 and 6.1.1.4' 
 
_symmetry_cell_setting            monoclinic
_symmetry_space_group_name_H-M    P21/n
 
loop_ 
 _symmetry_equiv_pos_as_xyz 
 'x, y, z' 
 '-x+1/2, y+1/2, -z+1/2' 
 '-x, -y, -z' 
 'x-1/2, -y-1/2, z-1/2' 
 
_cell_length_a                    9.7526(3) 
_cell_length_b                    11.0920(4) 
_cell_length_c                    12.3529(4) 
_cell_angle_alpha                 90.00 
_cell_angle_beta                  92.3555(19) 
_cell_angle_gamma                 90.00 
_cell_volume                      1335.16(8) 
_cell_formula_units_Z             4 
_cell_measurement_temperature     150(1) 
_cell_measurement_reflns_used     2682 
_cell_measurement_theta_min       1.018
_cell_measurement_theta_max       27.485
 
_exptl_crystal_description        plate 
_exptl_crystal_colour             orange
_exptl_crystal_size_max           0.18 
_exptl_crystal_size_mid           0.13 
_exptl_crystal_size_min           0.05 
_exptl_crystal_density_meas       ? 
_exptl_crystal_density_diffrn     1.971 
_exptl_crystal_density_method     'not measured' 
_exptl_crystal_F_000              760 
_exptl_absorpt_coefficient_mu     8.627 
_exptl_absorpt_correction_type    Multi-scan 
_exptl_absorpt_correction_T_min   0.3058 
_exptl_absorpt_correction_T_max   0.6723 
_exptl_absorpt_process_details    'DENZO-SMN (Otwinowski & Minor, 1997)' 
 
_exptl_special_details 
; 
  The program Denzo-SMN (Otwinowski & Minor, 1997) uses a scaling
 algorithm (Fox & Holmes, 1966) which effectively corrects for
 absorption effects. High redundancy data were used in the scaling
 program hence the 'multi-scan' code word was used. No transmission
 coefficients are available from the program (only scale factors for each
 frame). The scale factors in the experimental table are calculated
 from the 'size' command in the SHELXL-97 input file. 
; 
 
_diffrn_ambient_temperature       150(1) 
_diffrn_radiation_wavelength      0.71073 
_diffrn_radiation_type            MoK\a 
_diffrn_radiation_source          'fine-focus sealed tube' 
_diffrn_radiation_monochromator   graphite 
_diffrn_measurement_device_type   'Nonius KappaCCD Diffractometer'
_diffrn_measurement_method        'Phi plus Omega scan'
_diffrn_detector_area_resol_mean  ? 
_diffrn_standards_number          ? 
_diffrn_standards_interval_count  ? 
_diffrn_standards_interval_time   ? 
_diffrn_standards_decay_%         ? 
_diffrn_reflns_number             5098 
_diffrn_reflns_av_R_equivalents   0.0248 
_diffrn_reflns_av_sigmaI/netI     0.0355 
_diffrn_reflns_limit_h_min        -12 
_diffrn_reflns_limit_h_max        12 
_diffrn_reflns_limit_k_min        -13 
_diffrn_reflns_limit_k_max        14 
_diffrn_reflns_limit_l_min        -16 
_diffrn_reflns_limit_l_max        16 
_diffrn_reflns_theta_min          2.78 
_diffrn_reflns_theta_max          27.49 
_reflns_number_total              3039 
_reflns_number_gt                 2686 
_reflns_threshold_expression      >2sigma(I) 
 
_computing_data_collection        'Nonius COLLECT' 
_computing_cell_refinement        DENZO-SMN
_computing_data_reduction         DENZO-SMN 
_computing_structure_solution     SIR97 
_computing_structure_refinement   'SHELXL-97 (Sheldrick, 1997)' 
_computing_molecular_graphics     'WinGX, Ortep3' 
_computing_publication_material   ? 
 
_refine_special_details 
; 
 Refinement of F^2^ against ALL reflections.  The weighted R-factor wR and 
 goodness of fit S are based on F^2^, conventional R-factors R are based 
 on F, with F set to zero for negative F^2^. The threshold expression of 
 F^2^ > 2sigma(F^2^) is used only for calculating R-factors(gt) etc. and is 
 not relevant to the choice of reflections for refinement.  R-factors based 
 on F^2^ are statistically about twice as large as those based on F, and R- 
 factors based on ALL data will be even larger. 
; 
 
_refine_ls_structure_factor_coef  Fsqd  
_refine_ls_matrix_type            full 
_refine_ls_weighting_scheme       calc  
_refine_ls_weighting_details 
 'calc w=1/[\s^2^(Fo^2^)+(0.0238P)^2^+0.6626P] where P=(Fo^2^+2Fc^2^)/3' 
_atom_sites_solution_primary      direct 
_atom_sites_solution_secondary    difmap 
_atom_sites_solution_hydrogens    geom 
_refine_ls_hydrogen_treatment     mixed 
_refine_ls_extinction_method      none 
_refine_ls_extinction_coef        ? 
_refine_ls_number_reflns          3039 
_refine_ls_number_parameters      234 
_refine_ls_number_restraints      0 
_refine_ls_R_factor_all           0.0287 
_refine_ls_R_factor_gt            0.0229 
_refine_ls_wR_factor_ref          0.0547 
_refine_ls_wR_factor_gt           0.0523 
_refine_ls_goodness_of_fit_ref    1.068 
_refine_ls_restrained_S_all       1.068 
_refine_ls_shift/su_max           0.002 
_refine_ls_shift/su_mean          0.000 
 
loop_ 
 _atom_site_label 
 _atom_site_type_symbol 
 _atom_site_fract_x 
 _atom_site_fract_y 
 _atom_site_fract_z 
 _atom_site_U_iso_or_equiv 
 _atom_site_adp_type 
 _atom_site_occupancy 
 _atom_site_symmetry_multiplicity 
 _atom_site_calc_flag 
 _atom_site_refinement_flags 
 _atom_site_disorder_assembly 
 _atom_site_disorder_group 
W1 W 0.744878(12) 0.213016(11) 0.339415(10) 0.01539(6) Uani 1 1 d . . . 
C1 C 0.7880(5) 0.2267(4) 0.1618(3) 0.0235(8) Uani 1 1 d . . . 
C2 C 0.6989(4) 0.3255(4) 0.1845(3) 0.0249(9) Uani 1 1 d . . . 
C3 C 0.5731(4) 0.2747(4) 0.2113(3) 0.0278(9) Uani 1 1 d . . . 
C4 C 0.5825(4) 0.1481(4) 0.2051(3) 0.0256(8) Uani 1 1 d . . . 
C5 C 0.7148(4) 0.1169(4) 0.1750(3) 0.0247(8) Uani 1 1 d . . . 
C6 C 0.7640(5) 0.2672(5) 0.5248(4) 0.0315(10) Uani 1 1 d . . . 
C7 C 0.6354(4) 0.3028(4) 0.4769(3) 0.0297(9) Uani 1 1 d . . . 
C8 C 0.5654(4) 0.1952(4) 0.4447(3) 0.0292(9) Uani 1 1 d . . . 
C9 C 0.6542(4) 0.0942(4) 0.4684(3) 0.0302(9) Uani 1 1 d . . . 
C10 C 0.7744(4) 0.1425(5) 0.5195(3) 0.0328(10) Uani 1 1 d . . . 
C11 C 0.9313(4) 0.3314(3) 0.3548(3) 0.0213(8) Uani 1 1 d . . . 
C12 C 0.9499(4) 0.1209(3) 0.3461(3) 0.0217(8) Uani 1 1 d . . . 
C13 C 1.0329(4) 0.2303(3) 0.3861(3) 0.0212(8) Uani 1 1 d . . . 
C14 C 1.1758(4) 0.2451(4) 0.3401(4) 0.0285(9) Uani 1 1 d . . . 
C15 C 1.2441(4) 0.3607(4) 0.3742(4) 0.0277(9) Uani 1 1 d . . . 
C16 C 1.2704(5) 0.4512(4) 0.3091(4) 0.0344(10) Uani 1 1 d . . . 
H1 H 0.872(5) 0.235(4) 0.136(4) 0.029(12) Uiso 1 1 d . . . 
H2 H 0.722(4) 0.402(4) 0.180(3) 0.026(11) Uiso 1 1 d . . . 
H3 H 0.496(4) 0.321(3) 0.233(3) 0.021(10) Uiso 1 1 d . . . 
H4 H 0.510(4) 0.091(4) 0.224(3) 0.028(11) Uiso 1 1 d . . . 
H5 H 0.743(3) 0.042(4) 0.157(2) 0.008(9) Uiso 1 1 d . . . 
H6 H 0.829(5) 0.326(4) 0.554(4) 0.031(11) Uiso 1 1 d . . . 
H7 H 0.613(4) 0.382(4) 0.470(3) 0.036(12) Uiso 1 1 d . . . 
H8 H 0.477(4) 0.191(3) 0.411(3) 0.025(10) Uiso 1 1 d . . . 
H9 H 0.632(4) 0.010(4) 0.451(3) 0.032(11) Uiso 1 1 d . . . 
H10 H 0.848(4) 0.097(4) 0.542(3) 0.037(12) Uiso 1 1 d . . . 
H11A H 0.945(4) 0.368(3) 0.283(3) 0.020(10) Uiso 1 1 d . . . 
H11B H 0.926(3) 0.399(3) 0.409(3) 0.012(9) Uiso 1 1 d . . . 
H12A H 0.978(3) 0.102(3) 0.277(3) 0.017(10) Uiso 1 1 d . . . 
H12B H 0.967(4) 0.047(4) 0.395(3) 0.029(11) Uiso 1 1 d . . . 
H13 H 1.050(5) 0.228(4) 0.465(4) 0.032(12) Uiso 1 1 d . . . 
H14A H 1.164(5) 0.236(4) 0.258(4) 0.044(14) Uiso 1 1 d . . . 
H14B H 1.235(4) 0.175(4) 0.365(4) 0.032(12) Uiso 1 1 d . . . 
H15 H 1.259(5) 0.373(5) 0.445(4) 0.053(15) Uiso 1 1 d . . . 
H16A H 1.243(5) 0.439(6) 0.229(5) 0.08(2) Uiso 1 1 d . . . 
H16B H 1.312(5) 0.524(4) 0.339(4) 0.046(13) Uiso 1 1 d . . . 
 
loop_ 
 _atom_site_aniso_label 
 _atom_site_aniso_U_11 
 _atom_site_aniso_U_22 
 _atom_site_aniso_U_33 
 _atom_site_aniso_U_23 
 _atom_site_aniso_U_13 
 _atom_site_aniso_U_12 
W1 0.01318(9) 0.01756(9) 0.01535(9) -0.00014(5) -0.00033(6) 0.00124(5) 
C1 0.027(2) 0.029(2) 0.0139(19) -0.0002(15) 0.0008(16) -0.0070(17) 
C2 0.035(2) 0.0181(18) 0.021(2) 0.0027(16) -0.0087(18) 0.0006(17) 
C3 0.024(2) 0.033(2) 0.025(2) -0.0034(17) -0.0096(18) 0.0074(17) 
C4 0.0214(19) 0.030(2) 0.025(2) 0.0010(17) -0.0054(16) -0.0038(17) 
C5 0.036(2) 0.0153(18) 0.023(2) -0.0065(14) -0.0009(17) -0.0035(16) 
C6 0.026(2) 0.052(3) 0.016(2) -0.0036(19) 0.0040(18) 0.001(2) 
C7 0.029(2) 0.038(2) 0.022(2) -0.0066(17) 0.0055(17) 0.0117(19) 
C8 0.0145(18) 0.047(2) 0.027(2) 0.0013(18) 0.0051(17) 0.0001(17) 
C9 0.031(2) 0.038(2) 0.023(2) 0.0113(18) 0.0090(17) -0.0032(18) 
C10 0.025(2) 0.055(3) 0.0192(19) 0.010(2) 0.0029(17) 0.010(2) 
C11 0.0184(18) 0.0191(18) 0.026(2) -0.0009(16) -0.0010(16) 0.0017(15) 
C12 0.0166(17) 0.0213(19) 0.027(2) 0.0001(16) 0.0015(15) 0.0040(15) 
C13 0.0188(18) 0.0217(18) 0.023(2) 0.0006(14) -0.0010(16) 0.0010(14) 
C14 0.021(2) 0.026(2) 0.039(3) -0.0028(19) 0.0036(19) 0.0012(17) 
C15 0.0170(19) 0.039(2) 0.028(2) -0.006(2) 0.0012(16) -0.0045(17) 
C16 0.036(2) 0.031(2) 0.037(2) -0.008(2) 0.011(2) -0.006(2) 
 
_geom_special_details 
; 
 All esds (except the esd in the dihedral angle between two l.s. planes) 
 are estimated using the full covariance matrix.  The cell esds are taken 
 into account individually in the estimation of esds in distances, angles 
 and torsion angles; correlations between esds in cell parameters are only 
 used when they are defined by crystal symmetry.  An approximate (isotropic) 
 treatment of cell esds is used for estimating esds involving l.s. planes. 
; 
 
loop_ 
 _geom_bond_atom_site_label_1 
 _geom_bond_atom_site_label_2 
 _geom_bond_distance 
 _geom_bond_site_symmetry_2 
 _geom_bond_publ_flag 
W1 C8 2.232(4) . ? 
W1 C12 2.244(3) . ? 
W1 C11 2.244(4) . ? 
W1 C1 2.256(4) . ? 
W1 C7 2.272(4) . ? 
W1 C9 2.274(4) . ? 
W1 C5 2.302(4) . ? 
W1 C2 2.313(4) . ? 
W1 C3 2.358(4) . ? 
W1 C4 2.359(4) . ? 
W1 C10 2.365(4) . ? 
W1 C6 2.367(4) . ? 
C1 C5 1.424(6) . ? 
C1 C2 1.434(7) . ? 
C1 H1 0.90(5) . ? 
C2 C3 1.401(6) . ? 
C2 H2 0.88(5) . ? 
C3 C4 1.410(6) . ? 
C3 H3 0.96(4) . ? 
C4 C5 1.400(6) . ? 
C4 H4 0.98(4) . ? 
C5 H5 0.90(4) . ? 
C6 C10 1.389(7) . ? 
C6 C7 1.420(6) . ? 
C6 H6 0.96(4) . ? 
C7 C8 1.424(6) . ? 
C7 H7 0.91(5) . ? 
C8 C9 1.439(6) . ? 
C8 H8 0.94(4) . ? 
C9 C10 1.415(6) . ? 
C9 H9 0.98(4) . ? 
C10 H10 0.91(4) . ? 
C11 C13 1.535(5) . ? 
C11 H11A 0.99(4) . ? 
C11 H11B 1.00(3) . ? 
C12 C13 1.529(5) . ? 
C12 H12A 0.93(4) . ? 
C12 H12B 1.03(4) . ? 
C13 C14 1.535(6) . ? 
C13 H13 0.98(5) . ? 
C14 C15 1.498(6) . ? 
C14 H14A 1.02(5) . ? 
C14 H14B 1.00(5) . ? 
C15 C16 1.318(6) . ? 
C15 H15 0.90(5) . ? 
C16 H16A 1.02(6) . ? 
C16 H16B 0.98(5) . ? 
 
loop_ 
 _geom_angle_atom_site_label_1 
 _geom_angle_atom_site_label_2 
 _geom_angle_atom_site_label_3 
 _geom_angle 
 _geom_angle_site_symmetry_1 
 _geom_angle_site_symmetry_3 
 _geom_angle_publ_flag 
C8 W1 C12 131.08(15) . . ? 
C8 W1 C11 130.88(15) . . ? 
C12 W1 C11 62.99(13) . . ? 
C8 W1 C1 138.98(16) . . ? 
C12 W1 C1 82.25(16) . . ? 
C11 W1 C1 81.98(15) . . ? 
C8 W1 C7 36.84(16) . . ? 
C12 W1 C7 128.10(15) . . ? 
C11 W1 C7 94.82(15) . . ? 
C1 W1 C7 144.04(16) . . ? 
C8 W1 C9 37.22(15) . . ? 
C12 W1 C9 94.69(15) . . ? 
C11 W1 C9 128.07(15) . . ? 
C1 W1 C9 144.43(15) . . ? 
C7 W1 C9 61.47(17) . . ? 
C8 W1 C5 113.48(16) . . ? 
C12 W1 C5 84.42(14) . . ? 
C11 W1 C5 114.78(15) . . ? 
C1 W1 C5 36.39(14) . . ? 
C7 W1 C5 144.65(16) . . ? 
C9 W1 C5 108.08(15) . . ? 
C8 W1 C2 113.56(16) . . ? 
C12 W1 C2 114.74(15) . . ? 
C11 W1 C2 83.32(14) . . ? 
C1 W1 C2 36.54(17) . . ? 
C7 W1 C2 107.52(16) . . ? 
C9 W1 C2 145.51(15) . . ? 
C5 W1 C2 60.41(15) . . ? 
C8 W1 C3 82.19(16) . . ? 
C12 W1 C3 139.85(15) . . ? 
C11 W1 C3 115.96(14) . . ? 
C1 W1 C3 58.90(16) . . ? 
C7 W1 C3 91.83(15) . . ? 
C9 W1 C3 110.62(15) . . ? 
C5 W1 C3 58.74(14) . . ? 
C2 W1 C3 34.89(15) . . ? 
C8 W1 C4 82.12(15) . . ? 
C12 W1 C4 117.27(14) . . ? 
C11 W1 C4 139.14(14) . . ? 
C1 W1 C4 58.85(15) . . ? 
C7 W1 C4 109.71(15) . . ? 
C9 W1 C4 92.67(15) . . ? 
C5 W1 C4 34.94(14) . . ? 
C2 W1 C4 58.72(14) . . ? 
C3 W1 C4 34.80(14) . . ? 
C8 W1 C10 59.39(15) . . ? 
C12 W1 C10 74.96(15) . . ? 
C11 W1 C10 92.68(15) . . ? 
C1 W1 C10 156.46(16) . . ? 
C7 W1 C10 58.98(16) . . ? 
C9 W1 C10 35.44(15) . . ? 
C5 W1 C10 133.08(16) . . ? 
C2 W1 C10 165.68(16) . . ? 
C3 W1 C10 141.55(15) . . ? 
C4 W1 C10 127.82(15) . . ? 
C8 W1 C6 59.44(16) . . ? 
C12 W1 C6 92.59(15) . . ? 
C11 W1 C6 74.81(16) . . ? 
C1 W1 C6 155.95(17) . . ? 
C7 W1 C6 35.57(15) . . ? 
C9 W1 C6 59.16(16) . . ? 
C5 W1 C6 166.70(16) . . ? 
C2 W1 C6 131.94(15) . . ? 
C3 W1 C6 126.94(15) . . ? 
C4 W1 C6 141.45(15) . . ? 
C10 W1 C6 34.14(18) . . ? 
C5 C1 C2 108.7(4) . . ? 
C5 C1 W1 73.5(2) . . ? 
C2 C1 W1 73.9(2) . . ? 
C5 C1 H1 127(3) . . ? 
C2 C1 H1 124(3) . . ? 
W1 C1 H1 124(3) . . ? 
C3 C2 C1 106.4(4) . . ? 
C3 C2 W1 74.3(2) . . ? 
C1 C2 W1 69.6(2) . . ? 
C3 C2 H2 129(3) . . ? 
C1 C2 H2 125(3) . . ? 
W1 C2 H2 122(2) . . ? 
C2 C3 C4 109.1(4) . . ? 
C2 C3 W1 70.8(2) . . ? 
C4 C3 W1 72.6(2) . . ? 
C2 C3 H3 124(2) . . ? 
C4 C3 H3 127(2) . . ? 
W1 C3 H3 121(2) . . ? 
C5 C4 C3 108.8(4) . . ? 
C5 C4 W1 70.3(2) . . ? 
C3 C4 W1 72.6(2) . . ? 
C5 C4 H4 126(2) . . ? 
C3 C4 H4 125(2) . . ? 
W1 C4 H4 120(2) . . ? 
C4 C5 C1 106.9(4) . . ? 
C4 C5 W1 74.8(2) . . ? 
C1 C5 W1 70.1(2) . . ? 
C4 C5 H5 125(2) . . ? 
C1 C5 H5 127(2) . . ? 
W1 C5 H5 127(2) . . ? 
C10 C6 C7 108.8(4) . . ? 
C10 C6 W1 72.8(2) . . ? 
C7 C6 W1 68.6(2) . . ? 
C10 C6 H6 130(3) . . ? 
C7 C6 H6 121(3) . . ? 
W1 C6 H6 124(3) . . ? 
C6 C7 C8 106.8(4) . . ? 
C6 C7 W1 75.9(2) . . ? 
C8 C7 W1 70.0(2) . . ? 
C6 C7 H7 120(3) . . ? 
C8 C7 H7 133(3) . . ? 
W1 C7 H7 118(3) . . ? 
C7 C8 C9 108.5(4) . . ? 
C7 C8 W1 73.1(2) . . ? 
C9 C8 W1 73.0(2) . . ? 
C7 C8 H8 126(2) . . ? 
C9 C8 H8 126(2) . . ? 
W1 C8 H8 119(3) . . ? 
C10 C9 C8 106.1(4) . . ? 
C10 C9 W1 75.8(2) . . ? 
C8 C9 W1 69.8(2) . . ? 
C10 C9 H9 129(2) . . ? 
C8 C9 H9 125(2) . . ? 
W1 C9 H9 119(2) . . ? 
C6 C10 C9 109.7(4) . . ? 
C6 C10 W1 73.0(2) . . ? 
C9 C10 W1 68.8(2) . . ? 
C6 C10 H10 126(3) . . ? 
C9 C10 H10 124(3) . . ? 
W1 C10 H10 123(3) . . ? 
C13 C11 W1 96.1(2) . . ? 
C13 C11 H11A 115(2) . . ? 
W1 C11 H11A 108(2) . . ? 
C13 C11 H11B 115.4(19) . . ? 
W1 C11 H11B 115.3(19) . . ? 
H11A C11 H11B 107(3) . . ? 
C13 C12 W1 96.3(2) . . ? 
C13 C12 H12A 108(2) . . ? 
W1 C12 H12A 111(2) . . ? 
C13 C12 H12B 112(2) . . ? 
W1 C12 H12B 120(2) . . ? 
H12A C12 H12B 108(3) . . ? 
C12 C13 C11 99.9(3) . . ? 
C12 C13 C14 116.2(3) . . ? 
C11 C13 C14 114.5(3) . . ? 
C12 C13 H13 111(2) . . ? 
C11 C13 H13 111(3) . . ? 
C14 C13 H13 104(3) . . ? 
C15 C14 C13 112.8(3) . . ? 
C15 C14 H14A 113(3) . . ? 
C13 C14 H14A 107(3) . . ? 
C15 C14 H14B 109(3) . . ? 
C13 C14 H14B 109(3) . . ? 
H14A C14 H14B 105(3) . . ? 
C16 C15 C14 125.1(4) . . ? 
C16 C15 H15 117(3) . . ? 
C14 C15 H15 117(3) . . ? 
C15 C16 H16A 116(3) . . ? 
C15 C16 H16B 119(3) . . ? 
H16A C16 H16B 125(4) . . ? 
 
loop_ 
 _geom_torsion_atom_site_label_1 
 _geom_torsion_atom_site_label_2 
 _geom_torsion_atom_site_label_3 
 _geom_torsion_atom_site_label_4 
 _geom_torsion 
 _geom_torsion_site_symmetry_1 
 _geom_torsion_site_symmetry_2 
 _geom_torsion_site_symmetry_3 
 _geom_torsion_site_symmetry_4 
 _geom_torsion_publ_flag 
C8 W1 C1 C5 -57.6(3) . . . . ? 
C12 W1 C1 C5 91.1(3) . . . . ? 
C11 W1 C1 C5 154.8(3) . . . . ? 
C7 W1 C1 C5 -118.1(3) . . . . ? 
C9 W1 C1 C5 3.9(4) . . . . ? 
C2 W1 C1 C5 -115.7(4) . . . . ? 
C3 W1 C1 C5 -78.3(3) . . . . ? 
C4 W1 C1 C5 -37.4(2) . . . . ? 
C10 W1 C1 C5 76.6(5) . . . . ? 
C6 W1 C1 C5 170.0(3) . . . . ? 
C8 W1 C1 C2 58.1(3) . . . . ? 
C12 W1 C1 C2 -153.2(3) . . . . ? 
C11 W1 C1 C2 -89.6(3) . . . . ? 
C7 W1 C1 C2 -2.4(4) . . . . ? 
C9 W1 C1 C2 119.5(3) . . . . ? 
C5 W1 C1 C2 115.7(4) . . . . ? 
C3 W1 C1 C2 37.4(2) . . . . ? 
C4 W1 C1 C2 78.3(3) . . . . ? 
C10 W1 C1 C2 -167.8(4) . . . . ? 
C6 W1 C1 C2 -74.4(5) . . . . ? 
C5 C1 C2 C3 0.1(4) . . . . ? 
W1 C1 C2 C3 -65.8(3) . . . . ? 
C5 C1 C2 W1 65.8(3) . . . . ? 
C8 W1 C2 C3 -27.8(3) . . . . ? 
C12 W1 C2 C3 144.1(2) . . . . ? 
C11 W1 C2 C3 -159.8(3) . . . . ? 
C1 W1 C2 C3 114.7(4) . . . . ? 
C7 W1 C2 C3 -66.8(3) . . . . ? 
C9 W1 C2 C3 -1.9(4) . . . . ? 
C5 W1 C2 C3 76.8(3) . . . . ? 
C4 W1 C2 C3 36.1(2) . . . . ? 
C10 W1 C2 C3 -85.3(6) . . . . ? 
C6 W1 C2 C3 -97.1(3) . . . . ? 
C8 W1 C2 C1 -142.6(3) . . . . ? 
C12 W1 C2 C1 29.4(3) . . . . ? 
C11 W1 C2 C1 85.5(3) . . . . ? 
C7 W1 C2 C1 178.5(3) . . . . ? 
C9 W1 C2 C1 -116.6(3) . . . . ? 
C5 W1 C2 C1 -38.0(3) . . . . ? 
C3 W1 C2 C1 -114.7(4) . . . . ? 
C4 W1 C2 C1 -78.7(3) . . . . ? 
C10 W1 C2 C1 160.0(5) . . . . ? 
C6 W1 C2 C1 148.2(3) . . . . ? 
C1 C2 C3 C4 -0.3(4) . . . . ? 
W1 C2 C3 C4 -62.9(3) . . . . ? 
C1 C2 C3 W1 62.6(3) . . . . ? 
C8 W1 C3 C2 154.4(3) . . . . ? 
C12 W1 C3 C2 -55.6(3) . . . . ? 
C11 W1 C3 C2 22.5(3) . . . . ? 
C1 W1 C3 C2 -39.2(3) . . . . ? 
C7 W1 C3 C2 118.7(3) . . . . ? 
C9 W1 C3 C2 178.8(2) . . . . ? 
C5 W1 C3 C2 -82.0(3) . . . . ? 
C4 W1 C3 C2 -118.2(4) . . . . ? 
C10 W1 C3 C2 156.6(3) . . . . ? 
C6 W1 C3 C2 112.6(3) . . . . ? 
C8 W1 C3 C4 -87.4(3) . . . . ? 
C12 W1 C3 C4 62.6(3) . . . . ? 
C11 W1 C3 C4 140.7(2) . . . . ? 
C1 W1 C3 C4 79.0(3) . . . . ? 
C7 W1 C3 C4 -123.1(3) . . . . ? 
C9 W1 C3 C4 -63.0(3) . . . . ? 
C5 W1 C3 C4 36.2(2) . . . . ? 
C2 W1 C3 C4 118.2(4) . . . . ? 
C10 W1 C3 C4 -85.2(3) . . . . ? 
C6 W1 C3 C4 -129.2(3) . . . . ? 
C2 C3 C4 C5 0.5(4) . . . . ? 
W1 C3 C4 C5 -61.3(3) . . . . ? 
C2 C3 C4 W1 61.8(3) . . . . ? 
C8 W1 C4 C5 -154.2(3) . . . . ? 
C12 W1 C4 C5 -21.7(3) . . . . ? 
C11 W1 C4 C5 57.6(3) . . . . ? 
C1 W1 C4 C5 39.0(2) . . . . ? 
C7 W1 C4 C5 -179.0(2) . . . . ? 
C9 W1 C4 C5 -118.4(3) . . . . ? 
C2 W1 C4 C5 82.0(3) . . . . ? 
C3 W1 C4 C5 118.2(4) . . . . ? 
C10 W1 C4 C5 -113.5(3) . . . . ? 
C6 W1 C4 C5 -158.5(3) . . . . ? 
C8 W1 C4 C3 87.6(3) . . . . ? 
C12 W1 C4 C3 -139.9(2) . . . . ? 
C11 W1 C4 C3 -60.6(3) . . . . ? 
C1 W1 C4 C3 -79.2(3) . . . . ? 
C7 W1 C4 C3 62.8(3) . . . . ? 
C9 W1 C4 C3 123.4(3) . . . . ? 
C5 W1 C4 C3 -118.2(4) . . . . ? 
C2 W1 C4 C3 -36.2(3) . . . . ? 
C10 W1 C4 C3 128.3(3) . . . . ? 
C6 W1 C4 C3 83.3(3) . . . . ? 
C3 C4 C5 C1 -0.4(4) . . . . ? 
W1 C4 C5 C1 -63.1(3) . . . . ? 
C3 C4 C5 W1 62.7(3) . . . . ? 
C2 C1 C5 C4 0.2(4) . . . . ? 
W1 C1 C5 C4 66.3(3) . . . . ? 
C2 C1 C5 W1 -66.1(3) . . . . ? 
C8 W1 C5 C4 28.0(3) . . . . ? 
C12 W1 C5 C4 160.7(3) . . . . ? 
C11 W1 C5 C4 -142.5(2) . . . . ? 
C1 W1 C5 C4 -114.8(3) . . . . ? 
C7 W1 C5 C4 1.6(4) . . . . ? 
C9 W1 C5 C4 67.6(3) . . . . ? 
C2 W1 C5 C4 -76.7(3) . . . . ? 
C3 W1 C5 C4 -36.1(2) . . . . ? 
C10 W1 C5 C4 97.3(3) . . . . ? 
C6 W1 C5 C4 83.2(7) . . . . ? 
C8 W1 C5 C1 142.8(3) . . . . ? 
C12 W1 C5 C1 -84.5(3) . . . . ? 
C11 W1 C5 C1 -27.7(3) . . . . ? 
C7 W1 C5 C1 116.4(3) . . . . ? 
C9 W1 C5 C1 -177.6(2) . . . . ? 
C2 W1 C5 C1 38.1(3) . . . . ? 
C3 W1 C5 C1 78.8(3) . . . . ? 
C4 W1 C5 C1 114.8(3) . . . . ? 
C10 W1 C5 C1 -147.9(3) . . . . ? 
C6 W1 C5 C1 -162.0(6) . . . . ? 
C8 W1 C6 C10 79.5(3) . . . . ? 
C12 W1 C6 C10 -58.0(2) . . . . ? 
C11 W1 C6 C10 -119.1(3) . . . . ? 
C1 W1 C6 C10 -134.7(4) . . . . ? 
C7 W1 C6 C10 118.9(4) . . . . ? 
C9 W1 C6 C10 35.9(2) . . . . ? 
C5 W1 C6 C10 18.6(8) . . . . ? 
C2 W1 C6 C10 174.8(2) . . . . ? 
C3 W1 C6 C10 129.6(2) . . . . ? 
C4 W1 C6 C10 84.4(3) . . . . ? 
C8 W1 C6 C7 -39.5(3) . . . . ? 
C12 W1 C6 C7 -176.9(3) . . . . ? 
C11 W1 C6 C7 122.0(3) . . . . ? 
C1 W1 C6 C7 106.3(4) . . . . ? 
C9 W1 C6 C7 -83.0(3) . . . . ? 
C5 W1 C6 C7 -100.4(7) . . . . ? 
C2 W1 C6 C7 55.9(4) . . . . ? 
C3 W1 C6 C7 10.7(4) . . . . ? 
C4 W1 C6 C7 -34.5(4) . . . . ? 
C10 W1 C6 C7 -118.9(4) . . . . ? 
C10 C6 C7 C8 1.6(5) . . . . ? 
W1 C6 C7 C8 63.6(3) . . . . ? 
C10 C6 C7 W1 -62.1(3) . . . . ? 
C8 W1 C7 C6 114.1(4) . . . . ? 
C12 W1 C7 C6 3.9(4) . . . . ? 
C11 W1 C7 C6 -55.3(3) . . . . ? 
C1 W1 C7 C6 -138.2(3) . . . . ? 
C9 W1 C7 C6 75.9(3) . . . . ? 
C5 W1 C7 C6 157.0(3) . . . . ? 
C2 W1 C7 C6 -139.8(3) . . . . ? 
C3 W1 C7 C6 -171.5(3) . . . . ? 
C4 W1 C7 C6 158.0(3) . . . . ? 
C10 W1 C7 C6 35.0(3) . . . . ? 
C12 W1 C7 C8 -110.2(3) . . . . ? 
C11 W1 C7 C8 -169.4(2) . . . . ? 
C1 W1 C7 C8 107.6(3) . . . . ? 
C9 W1 C7 C8 -38.2(2) . . . . ? 
C5 W1 C7 C8 42.9(4) . . . . ? 
C2 W1 C7 C8 106.1(3) . . . . ? 
C3 W1 C7 C8 74.4(3) . . . . ? 
C4 W1 C7 C8 43.9(3) . . . . ? 
C10 W1 C7 C8 -79.1(3) . . . . ? 
C6 W1 C7 C8 -114.1(4) . . . . ? 
C6 C7 C8 C9 -2.7(5) . . . . ? 
W1 C7 C8 C9 64.9(3) . . . . ? 
C6 C7 C8 W1 -67.6(3) . . . . ? 
C12 W1 C8 C7 101.6(3) . . . . ? 
C11 W1 C8 C7 14.1(3) . . . . ? 
C1 W1 C8 C7 -121.5(3) . . . . ? 
C9 W1 C8 C7 116.1(4) . . . . ? 
C5 W1 C8 C7 -154.6(2) . . . . ? 
C2 W1 C8 C7 -88.0(3) . . . . ? 
C3 W1 C8 C7 -103.7(3) . . . . ? 
C4 W1 C8 C7 -138.8(3) . . . . ? 
C10 W1 C8 C7 77.9(3) . . . . ? 
C6 W1 C8 C7 38.1(3) . . . . ? 
C12 W1 C8 C9 -14.5(3) . . . . ? 
C11 W1 C8 C9 -102.1(3) . . . . ? 
C1 W1 C8 C9 122.4(3) . . . . ? 
C7 W1 C8 C9 -116.1(4) . . . . ? 
C5 W1 C8 C9 89.3(3) . . . . ? 
C2 W1 C8 C9 155.8(2) . . . . ? 
C3 W1 C8 C9 140.2(3) . . . . ? 
C4 W1 C8 C9 105.1(3) . . . . ? 
C10 W1 C8 C9 -38.2(3) . . . . ? 
C6 W1 C8 C9 -78.0(3) . . . . ? 
C7 C8 C9 C10 2.7(5) . . . . ? 
W1 C8 C9 C10 67.7(3) . . . . ? 
C7 C8 C9 W1 -65.0(3) . . . . ? 
C8 W1 C9 C10 -113.5(4) . . . . ? 
C12 W1 C9 C10 55.6(3) . . . . ? 
C11 W1 C9 C10 -3.4(3) . . . . ? 
C1 W1 C9 C10 138.9(3) . . . . ? 
C7 W1 C9 C10 -75.7(3) . . . . ? 
C5 W1 C9 C10 141.3(3) . . . . ? 
C2 W1 C9 C10 -154.9(3) . . . . ? 
C3 W1 C9 C10 -156.1(3) . . . . ? 
C4 W1 C9 C10 173.3(3) . . . . ? 
C6 W1 C9 C10 -34.6(3) . . . . ? 
C12 W1 C9 C8 169.1(2) . . . . ? 
C11 W1 C9 C8 110.1(3) . . . . ? 
C1 W1 C9 C8 -107.7(3) . . . . ? 
C7 W1 C9 C8 37.8(2) . . . . ? 
C5 W1 C9 C8 -105.3(3) . . . . ? 
C2 W1 C9 C8 -41.5(4) . . . . ? 
C3 W1 C9 C8 -42.7(3) . . . . ? 
C4 W1 C9 C8 -73.2(3) . . . . ? 
C10 W1 C9 C8 113.5(4) . . . . ? 
C6 W1 C9 C8 78.9(3) . . . . ? 
C7 C6 C10 C9 0.1(5) . . . . ? 
W1 C6 C10 C9 -59.3(3) . . . . ? 
C7 C6 C10 W1 59.4(3) . . . . ? 
C8 C9 C10 C6 -1.8(4) . . . . ? 
W1 C9 C10 C6 61.9(3) . . . . ? 
C8 C9 C10 W1 -63.6(3) . . . . ? 
C8 W1 C10 C6 -79.6(3) . . . . ? 
C12 W1 C10 C6 118.7(3) . . . . ? 
C11 W1 C10 C6 57.6(2) . . . . ? 
C1 W1 C10 C6 133.6(4) . . . . ? 
C7 W1 C10 C6 -36.5(3) . . . . ? 
C9 W1 C10 C6 -119.8(4) . . . . ? 
C5 W1 C10 C6 -174.2(2) . . . . ? 
C2 W1 C10 C6 -15.7(7) . . . . ? 
C3 W1 C10 C6 -82.2(3) . . . . ? 
C4 W1 C10 C6 -128.3(3) . . . . ? 
C8 W1 C10 C9 40.1(3) . . . . ? 
C12 W1 C10 C9 -121.6(3) . . . . ? 
C11 W1 C10 C9 177.3(3) . . . . ? 
C1 W1 C10 C9 -106.7(4) . . . . ? 
C7 W1 C10 C9 83.3(3) . . . . ? 
C5 W1 C10 C9 -54.5(3) . . . . ? 
C2 W1 C10 C9 104.0(6) . . . . ? 
C3 W1 C10 C9 37.5(4) . . . . ? 
C4 W1 C10 C9 -8.5(3) . . . . ? 
C6 W1 C10 C9 119.8(4) . . . . ? 
C8 W1 C11 C13 108.0(3) . . . . ? 
C12 W1 C11 C13 -14.3(2) . . . . ? 
C1 W1 C11 C13 -99.6(3) . . . . ? 
C7 W1 C11 C13 116.4(3) . . . . ? 
C9 W1 C11 C13 59.3(3) . . . . ? 
C5 W1 C11 C13 -83.4(3) . . . . ? 
C2 W1 C11 C13 -136.4(3) . . . . ? 
C3 W1 C11 C13 -149.2(2) . . . . ? 
C4 W1 C11 C13 -115.6(3) . . . . ? 
C10 W1 C11 C13 57.4(3) . . . . ? 
C6 W1 C11 C13 86.8(3) . . . . ? 
C8 W1 C12 C13 -107.7(3) . . . . ? 
C11 W1 C12 C13 14.3(2) . . . . ? 
C1 W1 C12 C13 99.2(3) . . . . ? 
C7 W1 C12 C13 -59.4(3) . . . . ? 
C9 W1 C12 C13 -116.4(3) . . . . ? 
C5 W1 C12 C13 135.8(3) . . . . ? 
C2 W1 C12 C13 82.1(3) . . . . ? 
C3 W1 C12 C13 113.4(3) . . . . ? 
C4 W1 C12 C13 148.1(2) . . . . ? 
C10 W1 C12 C13 -86.7(3) . . . . ? 
C6 W1 C12 C13 -57.2(3) . . . . ? 
W1 C12 C13 C11 -19.1(3) . . . . ? 
W1 C12 C13 C14 -142.8(3) . . . . ? 
W1 C11 C13 C12 19.1(3) . . . . ? 
W1 C11 C13 C14 144.0(3) . . . . ? 
C12 C13 C14 C15 174.1(4) . . . . ? 
C11 C13 C14 C15 58.3(5) . . . . ? 
C13 C14 C15 C16 -112.3(5) . . . . ? 
 
_diffrn_measured_fraction_theta_max    0.992 
_diffrn_reflns_theta_full              27.49 
_diffrn_measured_fraction_theta_full   0.992 
_refine_diff_density_max    1.298 
_refine_diff_density_min   -1.477 
_refine_diff_density_rms    0.141 
